# Supplementary material for: Robust and automatic definition of microbiome states
Source: PeerJ journal article supplement (doi:10.7717/peerj.6657), 2019-03-26

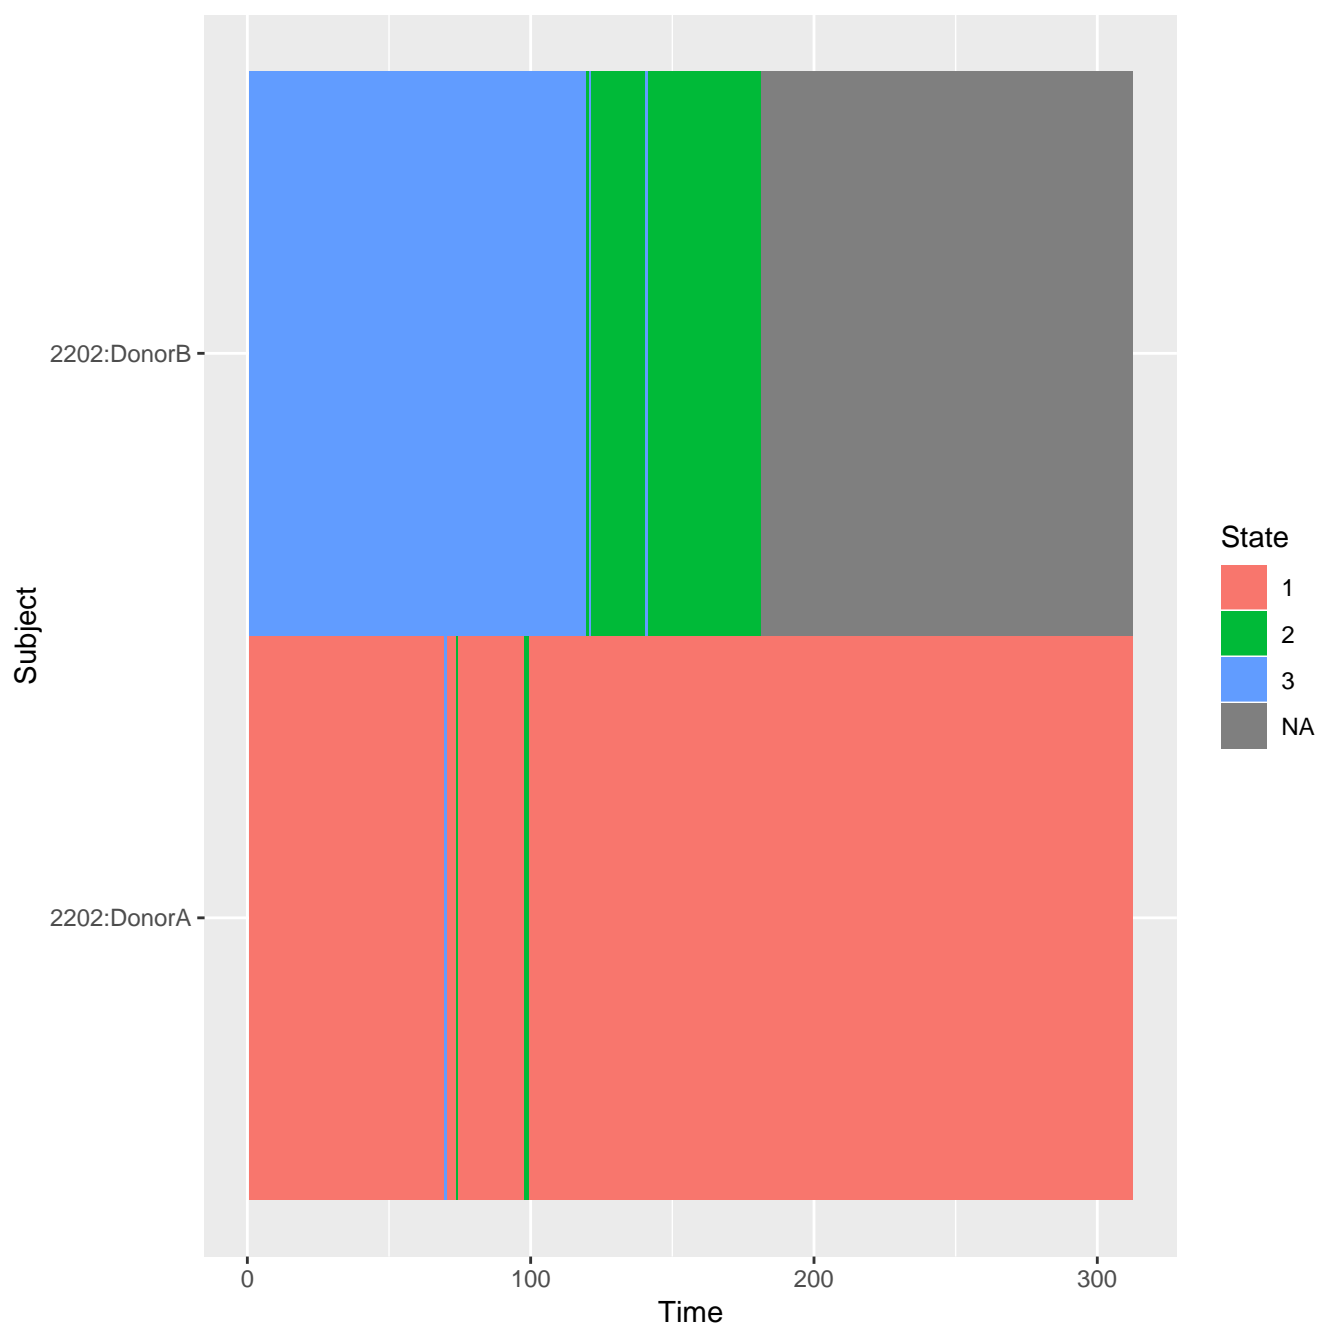

Supplement: FigS2.pdf [file FigS2.pdf]
