# Supplementary material for: Robust and automatic definition of microbiome states
Source: PeerJ journal article supplement (doi:10.7717/peerj.6657), 2019-03-26
Supplement: suppTableS1.pdf [file suppTableS1.pdf]

## Table S1

Table S1: Comparison between microbiome states defined in the current study vs those ones defined in (Gajer *et al.*, 2012).

|           | Current states |    |     |     |
|-----------|----------------|----|-----|-----|
| Gajer2012 | 4              | 2  | 1   | 3   |
| I         | 162            | 0  | 0   | 1   |
| II        | 0              | 57 | 0   | 0   |
| III       | 4              | 0  | 360 | 15  |
| IV-A      | 38             | 5  | 31  | 17  |
| IV-B      | 0              | 0  | 0   | 247 |
